# Supplementary material for: Modular Assembly of Phosphite Dehydrogenase and Phenylacetone Monooxygenase for Tuning Cofactor Regeneration
Source: MDPI journal article supplement (doi:10.3390/biom11060905), 2021-06-17
Supplement: s1 [file s1]

## *Supplementary Data*

### **Modular Assembly of Phosphite Dehydrogenase and Phenylacetone Monooxygenase for Tuning Cofactor Regeneration**

Nyoman Purwani<sup>a,b</sup>, Caterina Martin<sup>a</sup>, Simone Savino<sup>a</sup>, and Marco W. Fraaije<sup>a\*</sup>

<sup>b</sup>Molecular Enzymology Group, University of Groningen, Nijenborgh 4, 9747 AG Groningen, The Netherlands

<sup>a</sup>Department of Health, Faculty of Vocational Studies, Universitas Airlangga, Kampus C Mulyorejo, Surabaya 60115, Indonesia

\* Corresponding author. E-mail address: m.w.fraaije@rug.nl

**Table S1.** Oligonucleotide primer for PTDH and PAMO ORF amplification.

| Primer           | Primer (direction 5'-3'/ sequence)           |
|------------------|----------------------------------------------|
| PTDH For         | CCTGAAGGTCTCGTGGTATGCTGCCGAACTGGTCATCACCCATC |
| PTDH Rev         | CCCGGTCTCTCACCGTCAGCCGCAGGGTTGGCTTTTCG       |
| PAMO for         | CCTGAAGGTCTCGTGGTATGGCCGGGCAGACGACTGTC       |
| PAMO rev         | CCCGGTCTCTCACCGGTGAGGACGAAACCTTCGTA          |
| PAMO Bsa mut for | CTGCGCTCAGCAACATGCTGGTGTCTATC                |
| PAMO Bsa mut rev | CACGTGCTGTTCGATAGACACCAGCATGTTG              |

**Table S2.** Synthetic gene constructs.

| Synthetic genes | Base sequences                                                                                                                                                                                                                                                                                                                                        |
|-----------------|-------------------------------------------------------------------------------------------------------------------------------------------------------------------------------------------------------------------------------------------------------------------------------------------------------------------------------------------------------|
| RIAD            | CCTGAAGGTCTCGGGTGGTGGTGGTAGCGGTGGCGGTGGTTCAG                                                                                                                                                                                                                                                                                                          |
| RIAD-RIAD       | GCGGCGGTGGTTGCAGAGACCGCTAAAGTTGCGGTCTCTTTGCG<br>GTCTGGAACAGTATGCAAATCAGCTGGCAGATCAGATTATCAAA<br>GAAGCAACCGAAGGTTGCTAACTTGAGAGACCGGGAATGAAGG<br>TCTCGTTGCGGTAGCCTGCGTGAATGTGAACTGTATGTTTCAGAAA<br>CATAATATTCAGGCCCTGCTGAAAGATAGCATTGTTTCAGCTGTGT<br>ACCGCACGTCCGGAACGTCCGATGGCATTCTGCGCGAATATTTT<br>GAACGTCTGGA AAAAGAAGAAGCCAAATAACTTGAGAGACCGG<br>AC |
| RIDD            | CAAAGGTCTCATTGCGGTCTGGAACAGTATGCAAATCAGCTGGC<br>AGATCAGATTATCAAAGAAGCAACCGAAGGTTGCGGCGGTGGTG<br>GTAGCGGTGGCGGTGGTTCAGGCGGCGGTGGTTGTGGCCTGGAA<br>CAGTACGCGAATCAGCTGGCCGATCAGATCATCAAAGAAGCGAC<br>CGAAGGCTGTAACTTGAGAGACCAATGAAAGACGTTTCGATAT<br>GCTATAGCTATTTAGACTATATGGATATGCTATCGATAGATCGAT<br>CGGATATCGATTTAAATTTCGATTTAAATTATTATGCTATAGGCT<br>ATAG |

**Table S3.** Molecular weights of size exclusion chromatography standards.

| Standard Protein   | MW     | Log MW | Elution Vol (mL) |
|--------------------|--------|--------|------------------|
| Thyroglobulin      | 670000 | 5.83   | 9.48             |
| $\gamma$ -globulin | 158000 | 5.20   | 12.5             |
| Ovalbumine         | 44000  | 4.64   | 15.0             |
| Myoglobin          | 17000  | 4.23   | 16.82            |
| Vitamin B12        | 1350   | 3.13   | 19.75            |

**Table S4.** Conversion of bicyclo[3.2.0]hept-2-en-6-one. Conversion was measured by GC-MS analysis, based on product peak areas.

| Enzymes complexes                     | Time (hours) | Conversion (%) |
|---------------------------------------|--------------|----------------|
| PTDH <sub>A</sub> -PAMO <sub>I</sub>  | 5            | 59±4.2         |
|                                       | 24           | 88±0.2         |
| PTDH <sub>A2</sub> -PAMO <sub>I</sub> | 5            | 60±0.7         |
|                                       | 24           | 94.5±2.6       |
| PAMO <sub>A</sub> -PTDH <sub>I</sub>  | 5            | 60±5.6         |
|                                       | 24           | 78.5±0.7       |
| PAMO <sub>A2</sub> -PTDH <sub>I</sub> | 5            | 61.5±0.2       |
|                                       | 24           | 77.1±2.6       |
| PTDH-PAMO                             | 5            | 68±2.8         |
|                                       | 24           | 94.5±2.1       |

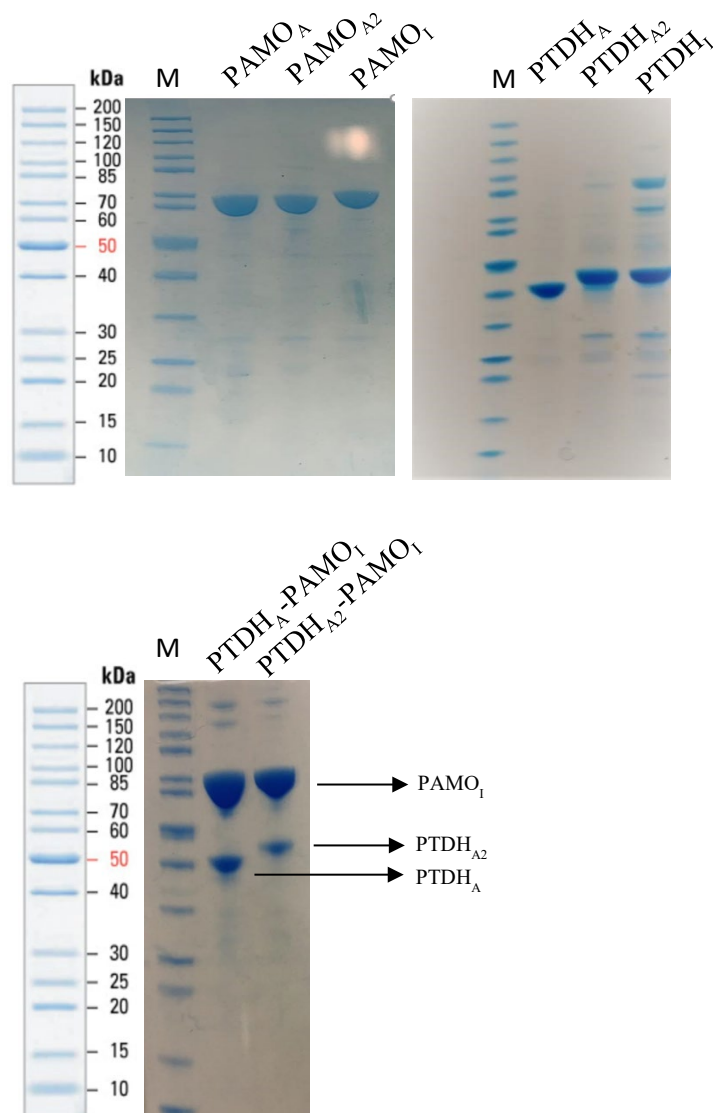

**Figure S1.** SDS-PAGE analysis. A: analysis of purified tagged PAMO variants; B: analysis of purified tagged PTDH variants; C: complex PTDH<sub>A</sub>-PAMO<sub>I</sub> and PTDH<sub>A2</sub>-PAMO<sub>I</sub>.

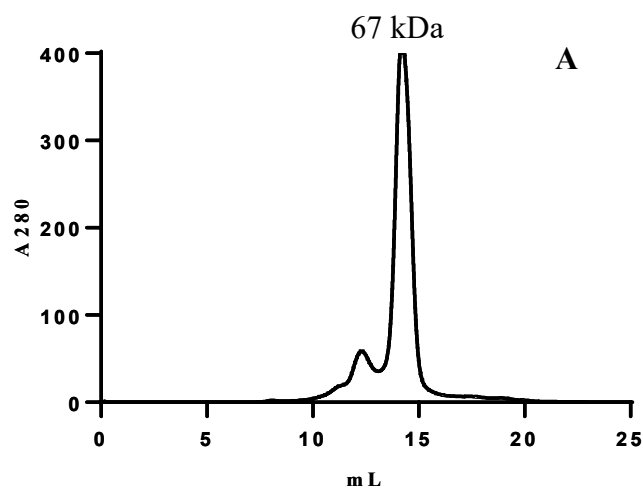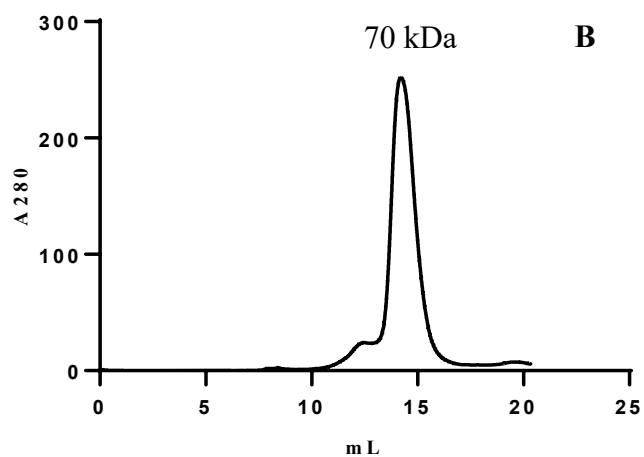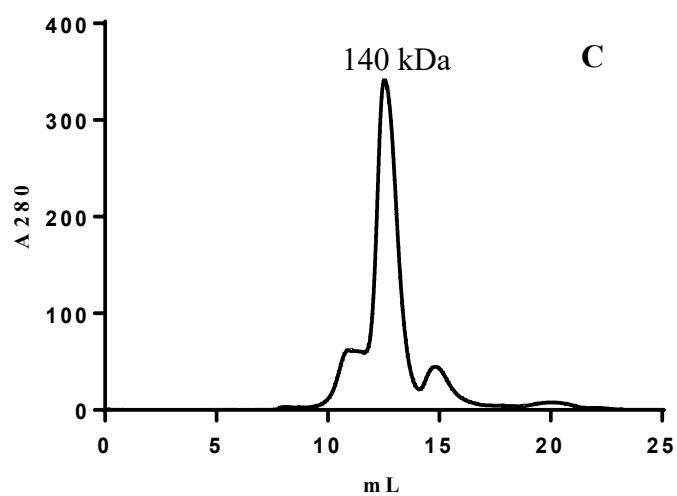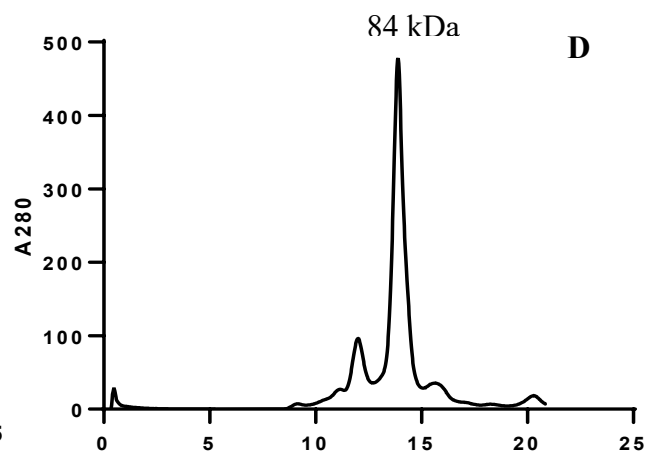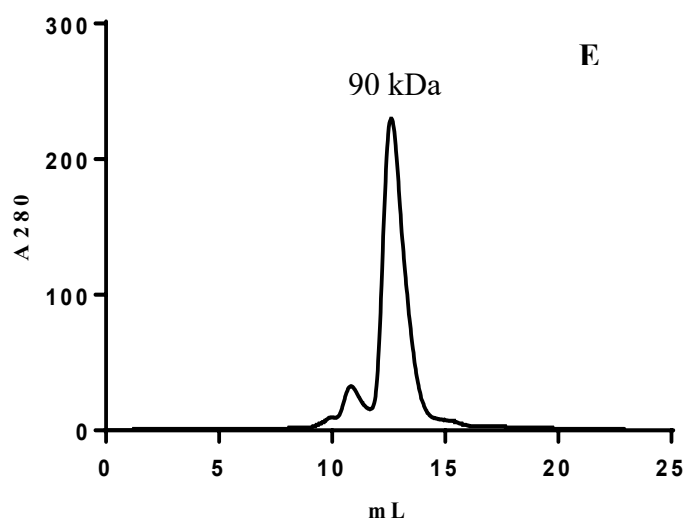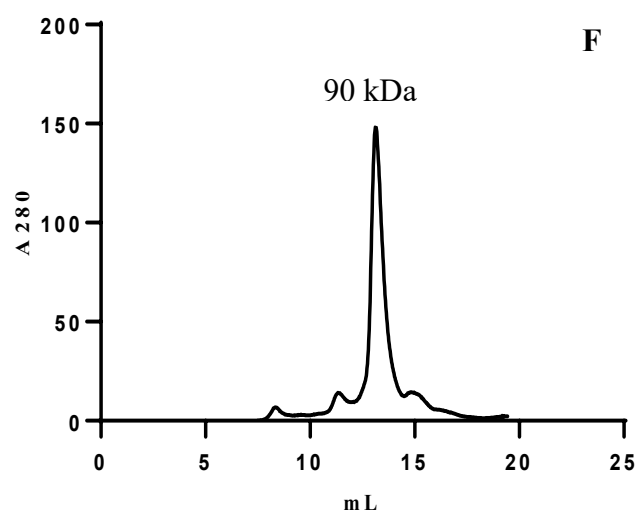

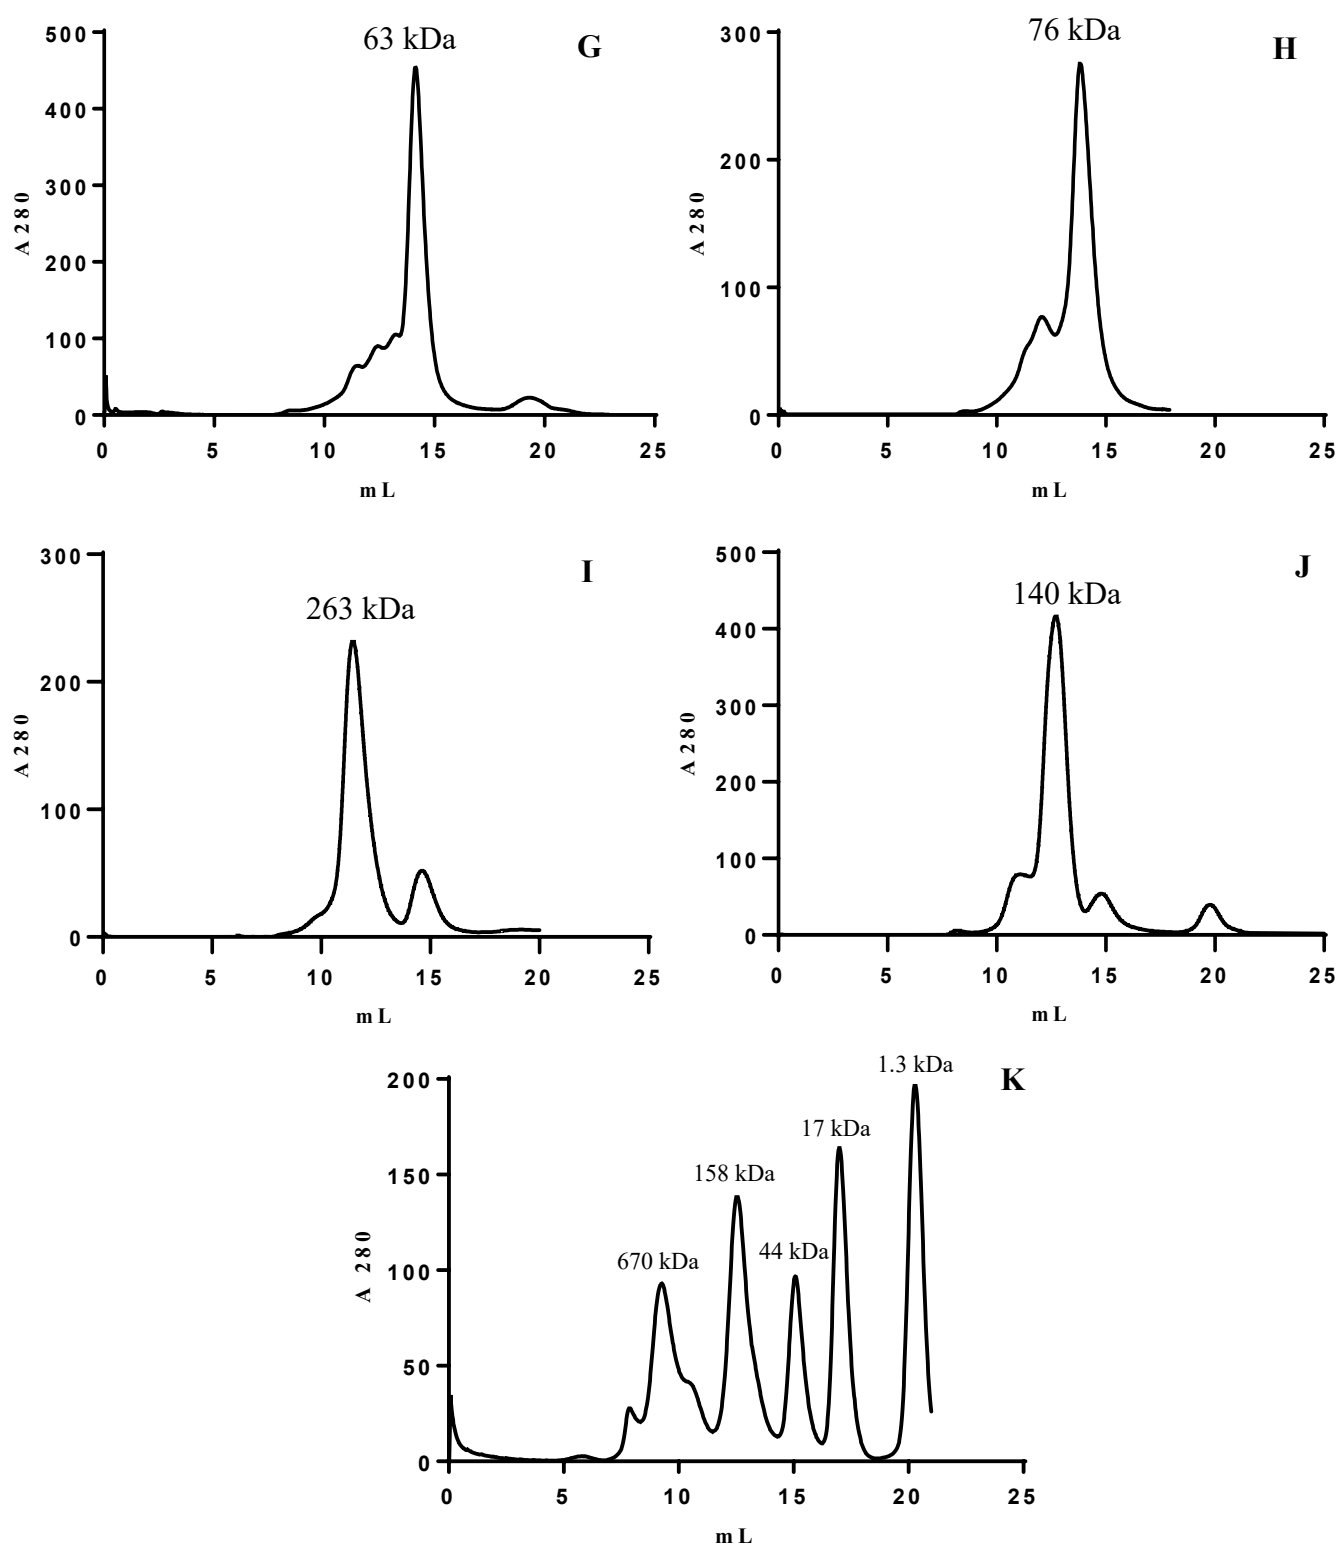

**Figure S2.** Size exclusion chromatogram of (A) PAMO<sub>A</sub>, (B) PAMO<sub>A2</sub>, (C) PAMO<sub>I</sub>, (D) PTDH<sub>A</sub>, (E) PTDH<sub>A2</sub>, (F) PTDH<sub>I</sub>, (G) PAMO<sub>A</sub>-PTDH<sub>I</sub>, (H) PAMO<sub>A2</sub>-PTDH<sub>I</sub>, (I) PAMO<sub>A</sub>-PAMO<sub>I</sub>, (J) PAMO<sub>A2</sub>-PAMO<sub>I</sub>, (K) size exclusion protein standards.
